# Supplementary material for: Modification of Biochar by Iron Containing Adsorption Centers as a Method to Enhance the Remediation of Perfluorooctanoic (PFOA) and Perfluorooctanesulphonic (PFOS) Acids from Water and Soil: A Density Functional Theory Study
Source: Research Square preprint supplement (doi:10.21203/rs.3.rs-7111972/v1), 2025-07-17
Supplement: Supplementary file 1 [file ed1a39e072ec06a3dac052c4.docx]

**Supplementary materials**

**The Interaction of Five Coordinated Iron Containing Adsorption Centers of Fe24O36 with Perfluorooctanoic (PFOA) and Perfluorooctanesulphonic (PFOS) Acids: A Density Functional Theory Study**

Leonid Gorb1,2, Anita Sosnowska2,3, Danuta Leszczynska4, Tomasz Puzyn2,3 and Jerzy Leszczynski5

1Institute of Molecular Biology and Genetics, NAS of Ukraine, 150 Zabolotny Str., Kyiv, 03143, Ukraine

2University of Gdansk, Faculty of Chemistry, Department of Environmental Chemistry and Radiochemistry, Laboratory of Environmental Chemoinformatics, Jana Bażyńskiego 8, 80-309 Gdańsk

3QSAR Lab Ltd. Gdańsk, Poland

4Department of Civil and Environmental Engineering, Jackson State University, Jackson, Mississippi, 39217, USA

5Department of Chemistry, Physics & Atmospheric Sciences, Jackson State University, Jackson, Mississippi, 39217, USA

Table 1S

Change coordination numbers of Fe and O atoms before and after the optimization of the geometry Fe24O36

| **Coordination**  **number** | **Fe** | | **O** | |
| --- | --- | --- | --- | --- |
| **srart** | **optim** | **start** | **optim** |
| 1 | 2 |  | 6 | 1 |
| 2 | 4 | 1 | 12 | 11 |
| 3 | 4 | 3 | 12 | 14 |
| 4 | 4 | 7 | 6 | 8 |
| 5 | 8 | 11 |  | 2 |
| 6 | 2 | 2 |  |  |
|  |  |  |  |  |


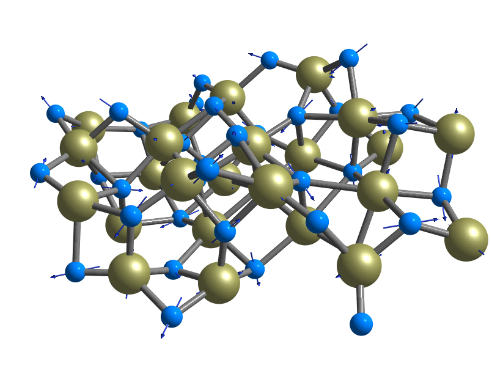


A


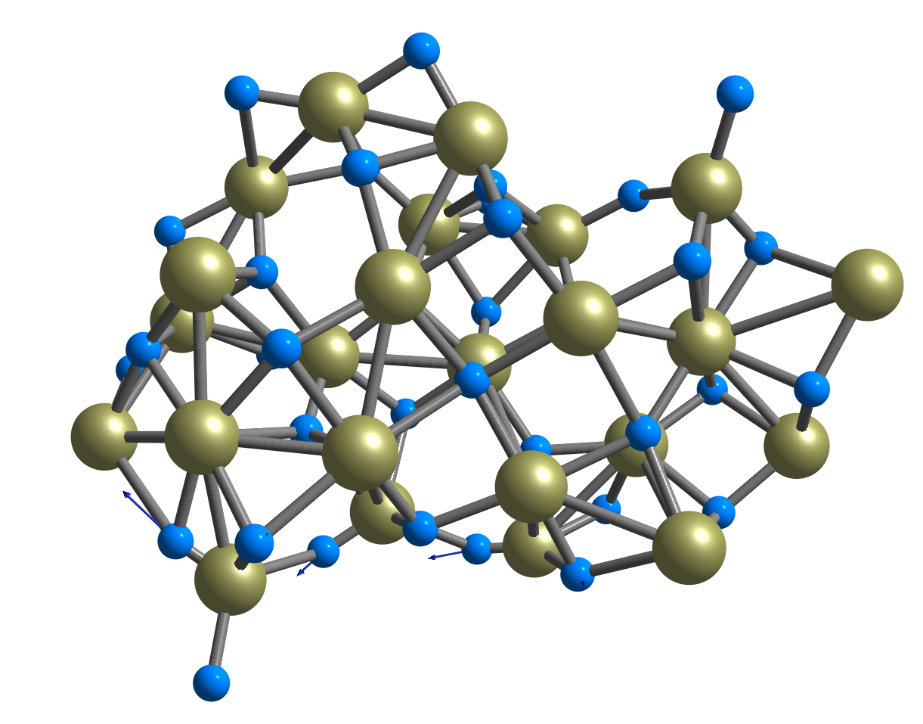


B

Figure 1S. Directions of displacement vectors of the 749.3 cm-1 vibraion of Fe24O36 (see Fig. 3). A – Simple visualization by Chemcraf program; B – application of the option “scaling vibrations vectors”

**Cartesian Coordinates**

**Fe24O36**

26 -1.299735000 2.203962000 0.895004000

8 -3.182299000 1.343202000 0.752066000

26 -3.847348000 3.171002000 1.121107000

26 1.437542000 1.580919000 1.644045000

26 3.959617000 1.334339000 1.427189000

26 2.358609000 0.014294000 -1.015574000

26 -0.456437000 0.241752000 -0.920932000

26 6.177800000 1.521334000 -0.250143000

26 -3.429087000 1.683829000 -1.100874000

26 -6.230136000 1.692709000 -0.675226000

26 3.625353000 3.820053000 0.771724000

26 -1.624525000 3.593036000 -1.377463000

26 1.268374000 2.825816000 -0.858353000

8 -2.181200000 3.882161000 0.242030000

8 -2.939501000 3.067315000 -2.301566000

8 2.557700000 -0.070812000 2.152178000

8 2.626152000 3.811735000 -0.805008000

8 2.594281000 1.364799000 0.029312000

8 0.949399000 -1.043316000 -0.522385000

8 0.971372000 1.172788000 -1.659859000

8 -0.327941000 0.457297000 0.952095000

8 -4.744956000 2.872292000 -0.497166000

8 -4.771666000 0.762811000 -1.589917000

8 -6.001222000 0.542684000 0.799207000

8 5.068462000 2.749554000 0.622795000

8 3.898959000 5.319419000 1.162071000

8 2.896932000 2.833713000 2.087830000

8 0.488945000 2.953491000 0.670047000

8 -1.474675000 1.760243000 -1.002725000

8 0.020288000 3.850367000 -1.750451000

26 -2.060383000 -0.539554000 1.450675000

8 -3.784207000 -1.411328000 1.589954000

26 -4.309257000 -0.197560000 0.112152000

26 0.918846000 -1.039645000 1.528049000

26 3.988198000 -1.233508000 1.563334000

26 2.014558000 -4.162768000 0.467928000

26 -0.322024000 -3.445486000 1.216317000

26 3.701548000 -3.129038000 -1.145752000

26 -4.276299000 -2.776362000 0.563358000

26 -6.872216000 -1.105204000 0.821253000

26 5.054939000 -0.684230000 -1.111759000

26 -1.951811000 -2.262849000 -1.545764000

26 0.499407000 -2.499231000 -1.741371000

8 -2.215035000 -0.733436000 -0.487774000

8 -3.346025000 -2.940707000 -1.062909000

8 3.602764000 -4.453984000 0.382536000

8 3.623366000 -0.003342000 -2.103468000

8 3.395129000 -1.452694000 -0.239345000

8 0.483729000 -4.986667000 1.076991000

8 1.731310000 -3.602264000 -1.219063000

8 1.450109000 -2.898568000 1.535139000

8 -5.513864000 -1.842744000 -0.272191000

8 -0.804857000 -2.040046000 2.023826000

8 -4.566383000 -4.147416000 1.275187000

8 5.412312000 -2.312674000 -1.383547000

8 6.332986000 0.348239000 -1.690166000

8 5.231628000 -0.012623000 0.587063000

8 -0.645706000 -0.968413000 -2.184495000

8 -0.673082000 -2.995775000 -0.418815000

8 -0.721188000 -3.150040000 -2.725985000

**Fe24O36H**+…. **CF3(CF2)6COO‑**

26 -0.922034 2.285638 -1.740075

8 0.762679 3.136657 -0.879039

26 0.647542 4.460933 -2.356049

26 -2.310707 -0.265140 -2.076635

26 -4.276815 -1.986557 -1.937153

26 -3.667838 -0.475046 0.856479

26 -1.633880 1.473539 0.854808

26 -6.891655 -2.428559 -1.055933

26 -0.158450 4.373839 0.228370

26 2.128600 6.043144 0.162534

26 -5.355091 0.008231 -3.186024

26 -2.460229 4.387913 -1.067478

26 -3.985782 1.770253 -1.138824

8 -1.335782 4.141339 -2.369729

8 -1.742328 5.408140 0.067109

8 -2.279157 -2.319139 -1.338733

8 -5.409970 1.388563 -1.937787

8 -3.857414 -0.418170 -0.852407

8 -1.923660 -0.397723 1.378317

8 -3.471199 1.409920 0.599187

8 -0.871010 0.605808 -0.632389

8 0.606512 5.650239 -0.907571

8 0.977908 4.980671 1.338167

8 3.201964 4.524332 -0.121326

8 -6.082076 -1.470225 -2.456605

8 -5.978621 0.519848 -4.531731

8 -3.723594 -0.756871 -3.348877

8 -2.685929 1.604774 -2.256920

8 -1.583725 3.058027 -0.066812

8 -3.974894 3.596757 -1.128820

26 1.108266 0.982433 -0.139789

8 2.825957 1.574246 0.517201

26 1.924594 3.315964 0.755213

26 -0.763740 -1.329370 -0.104997

26 -3.245564 -3.646444 -0.150586

26 -0.942249 -3.287463 2.743802

26 0.939087 -1.765924 1.993304

26 -3.501148 -3.043411 3.046489

26 3.216350 1.612962 2.253155

26 4.585912 4.139256 1.067185

26 -5.536678 -2.515518 1.202538

26 0.194888 1.358357 3.195269

26 -1.629443 -0.283532 3.321518

8 0.300281 1.882845 1.378904

8 1.759940 1.723992 3.439248

8 -2.066714 -4.453604 2.833489

8 -5.180875 -0.718461 1.512091

8 -3.486686 -2.372790 1.235348

8 0.767275 -3.007531 3.253669

8 -1.862616 -1.983634 3.584487

8 -0.365949 -2.778442 1.156680

8 3.343171 3.370632 2.274928

8 1.040121 -0.797355 0.626900

8 4.349648 0.645301 2.751644

8 -5.274933 -3.541577 2.513420

8 -7.217801 -2.413261 0.783939

8 -5.116354 -3.117779 -0.487056

8 -1.624934 1.539916 2.608122

8 0.162792 -0.463202 2.940299

8 -0.997604 0.656371 4.578827

9 11.543575 -2.373544 0.287500

9 11.007638 -1.669848 -1.685605

6 10.589757 -1.795514 -0.432216

9 10.334428 -0.588912 0.069395

9 9.516863 -3.754165 -1.131831

9 9.114828 -3.027317 0.897001

6 9.316165 -2.661091 -0.376102

6 8.060283 -1.921205 -0.882163

9 8.386138 -1.206367 -1.971806

9 7.638085 -1.089958 0.085603

9 6.858699 -3.869081 -0.336819

9 7.173424 -3.415775 -2.459677

6 6.912820 -2.888279 -1.252432

6 5.540447 -2.179093 -1.300558

9 5.101749 -2.020578 -0.038780

9 5.701609 -0.972366 -1.869787

9 4.629399 -4.282736 -1.834617

9 4.719031 -2.767828 -3.418355

6 3.046480 -2.536713 -1.775637

9 3.060366 -1.199154 -1.629084

9 2.702737 -3.115983 -0.607258

9 2.294469 -4.177721 -3.266300

6 2.003674 -2.932872 -2.840514

9 2.127774 -2.082283 -3.884749

8 -0.201089 -3.793041 -2.424126

8 0.374252 -1.740039 -1.688095

6 0.570246 -2.846527 -2.265728

1 -1.689285 -2.884924 -1.880883

6 4.488282 -2.975336 -2.111210

**Fe24O36**…. **CF3(CF2)6COO-**

26 0.243231 -1.496913 1.417699

8 -0.842338 -3.167754 0.869343

26 0.436969 -4.167976 2.002217

26 1.002029 1.125851 0.425908

26 1.265052 3.650169 0.387033

26 -1.668329 2.737095 0.907148

26 -2.151469 -0.051994 1.133581

26 0.675467 6.062044 1.664808

26 -2.044305 -3.129141 2.339543

26 -2.382924 -5.927165 2.089493

26 2.325511 3.060287 2.674969

26 -0.613154 -1.617468 3.962194

26 -0.054390 1.218539 3.008376

8 0.626246 -2.495083 3.117085

8 -1.944914 -2.642640 4.174060

8 0.491562 2.384133 -1.114755

8 0.939435 2.376794 3.722377

8 -0.020142 2.548369 1.365937

8 -2.375740 1.427693 -0.106202

8 -1.761673 1.322305 2.288661

8 -0.625387 -0.302914 0.059594

8 -1.148867 -4.695155 2.851828

8 -3.307435 -4.214285 1.977506

8 -1.959778 -5.791309 0.258049

8 1.880077 4.656103 1.965882

8 3.639259 3.028340 3.542279

8 2.482778 2.277517 1.057878

8 0.979513 0.172639 2.109213

8 -1.466063 -1.259393 2.333311

8 -0.338824 0.010993 4.382219

26 -1.284285 -1.904819 -1.017808

8 -2.151933 -3.503735 -1.741783

26 -2.562336 -3.913990 0.144338

26 -0.875995 0.898676 -1.518307

26 -0.296128 4.067220 -1.607542

26 -3.410383 2.771414 -3.022062

26 -3.043602 0.256693 -3.110452

26 -3.596147 4.568740 -1.183386

26 -3.890915 -3.553657 -2.077680

26 -3.175791 -6.376281 -1.027501

26 -1.663223 5.445333 0.630370

26 -4.579764 -1.031495 -0.306558

26 -4.327685 1.414985 -0.348408

8 -2.890145 -1.725556 0.128580

8 -5.004581 -2.376770 -1.115221

8 -3.310523 4.384779 -3.178666

8 -2.241856 4.068690 1.762135

8 -1.902008 3.853561 -0.605891

8 -3.987655 1.431877 -4.062878

8 -4.359525 2.720002 -1.496000

8 -1.970213 1.767070 -2.890674

8 -4.176297 -4.784495 -0.844580

8 -1.839719 -0.753259 -2.589029

8 -4.310719 -3.708116 -3.587816

8 -2.846163 6.127943 -0.360555

8 -1.105827 6.584093 1.824871

8 0.045465 5.240690 -0.028098

8 -3.896430 0.152212 1.068465

8 -3.986113 0.132546 -1.613210

8 -5.748559 0.514445 -0.162445

9 11.931208 -1.147548 0.448225

9 11.496606 -0.600029 -1.597791

6 11.040793 -0.573414 -0.351613

9 10.865317 0.691087 0.025791

9 9.845743 -2.512934 -0.884733

9 9.441505 -1.549970 1.043273

6 9.705172 -1.335047 -0.252865

6 8.521945 -0.566819 -0.877548

9 8.928536 0.000148 -2.025363

9 8.135980 0.391943 -0.019427

9 7.165565 -2.354498 -0.170376

9 7.568695 -2.156896 -2.316951

6 7.316305 -1.484486 -1.182141

6 6.000988 -0.689684 -1.352272

9 5.536061 -0.370382 -0.132080

9 6.261602 0.434329 -2.039697

9 4.946684 -2.765753 -1.676259

9 5.208587 -1.462894 -3.421210

6 3.501434 -0.923808 -1.891481

9 3.574991 0.420294 -1.896448

9 3.074715 -1.330529 -0.676530

9 2.687912 -2.686483 -3.193858

6 2.476653 -1.376121 -2.953493

9 2.712640 -0.685826 -4.084829

8 0.487321 -2.109762 -1.916567

8 0.681367 0.071011 -2.539680

6 1.046821 -1.119020 -2.435459

6 4.919360 -1.494106 -2.110571

**Fe24O36H+**…. **CF3(CF2)7SO3-**

26 -1.198105 -1.374128 2.021490

8 -2.319761 -2.847461 1.178867

26 -1.970696 -3.909128 2.799484

26 0.620272 0.762229 1.261352

26 1.527053 3.146742 1.191811

26 -1.461885 2.959058 0.381892

26 -2.732874 0.420589 0.559918

26 1.101388 5.807364 1.920029

26 -3.986436 -2.334370 1.960816

26 -4.822456 -5.025155 1.622912

26 1.356583 2.746814 3.736677

26 -3.012299 -0.868855 3.906842

26 -1.350442 1.563966 3.088402

8 -1.818775 -2.124043 3.768729

8 -4.523826 -1.578402 3.605323

8 1.147331 1.856510 -0.412302

8 -0.474444 2.587546 4.095993

8 -0.287657 2.527727 1.569374

8 -2.029423 1.669879 -0.752164

8 -2.507231 1.863517 1.656035

8 -1.027657 -0.325446 0.315122

8 -3.846190 -3.963131 2.876728

8 -5.181704 -3.173229 1.075428

8 -3.481495 -5.201054 0.306886

8 1.676548 4.261724 2.811925

8 2.122993 2.587944 5.103926

8 1.960127 1.683460 2.415952

8 -0.364203 0.175685 2.825780

8 -3.020916 -0.644370 2.036228

8 -2.499161 0.709662 4.270657

26 -1.539686 -1.967943 -0.779731

8 -2.393511 -3.508330 -1.719955

26 -3.672617 -3.311727 -0.196018

26 -0.263454 0.675097 -1.280203

26 1.136400 3.545896 -1.334776

26 -1.368834 2.668808 -3.896741

26 -1.633878 0.151763 -3.588152

26 -1.806262 4.761433 -2.453134

26 -3.786941 -3.103545 -2.849578

26 -3.212454 -5.384750 -1.540423

26 -0.652207 5.517277 -0.026060

26 -4.501935 -0.266710 -1.747024

26 -3.631513 2.024086 -1.831819

8 -3.355833 -1.216168 -0.586778

8 -4.914580 -1.648901 -2.503038

8 -0.807177 4.170708 -4.121230

8 -1.994981 4.499032 0.798105

8 -0.745356 3.818918 -1.146286

8 -1.802770 1.266250 -4.954462

8 -2.841438 3.086892 -2.947821

8 -0.405708 1.458286 -3.058116

8 -4.715648 -4.185719 -1.837320

8 -1.073202 -0.874197 -2.385890

8 -3.532026 -3.337838 -4.373841

8 -1.080019 6.246610 -1.487669

8 -0.379015 6.700145 1.220927

8 1.049202 4.850975 0.185997

8 -4.175858 0.944794 -0.297677

8 -3.161947 0.503592 -2.755965

8 -5.186197 1.473423 -2.233220

9 13.022505 -1.734191 -0.014898

9 12.089150 -1.326746 -1.922480

6 11.948455 -1.226024 -0.606636

9 11.832383 0.057773 -0.273834

9 10.705466 -3.205382 -0.731455

9 10.770882 -2.149001 1.188574

6 10.698855 -1.998209 -0.140854

6 9.379865 -1.275284 -0.484804

9 9.474306 -0.761911 -1.722354

9 9.197913 -0.279125 0.397483

9 8.282657 -3.044664 0.614784

9 8.135256 -2.942327 -1.569964

6 8.157979 -2.220734 -0.438225

6 6.823962 -1.448821 -0.299873

9 6.684468 -1.072206 0.978708

9 6.868445 -0.356638 -1.081018

9 5.757328 -3.560105 -0.284429

9 5.599416 -2.313889 -2.084467

6 4.260391 -1.765742 -0.223405

9 4.151347 -0.478960 -0.600321

9 4.256680 -1.848572 1.113899

9 2.958747 -3.710280 -0.061757

6 3.033651 -2.561179 -0.735135

9 3.119024 -2.810400 -2.043442

8 0.416455 -2.686551 -0.598584

8 1.426915 -0.622217 -1.545058

16 1.460023 -1.635931 -0.474368

6 5.610610 -2.305103 -0.744087

8 1.579207 -1.070475 0.896108
